# Supplementary material
Source: Springer Nature journal article supplement (https://www.springermedizin.de/resource/supplementary/12885_2009_1900_MOESM6_ESM.pdf/9460054)

# MET\_1

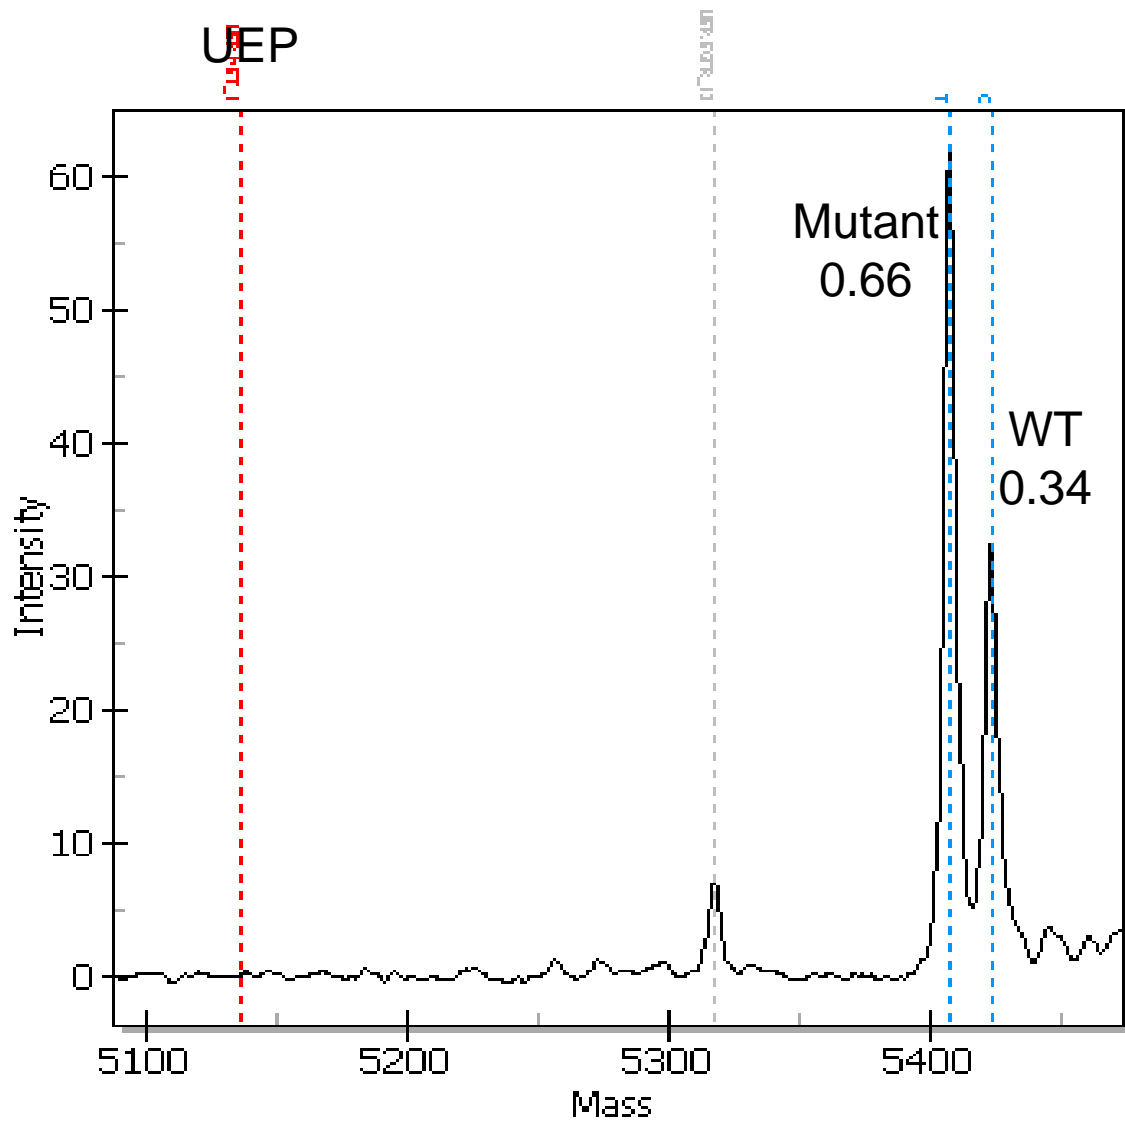

Supplement: MOESM6 [file 9460054]
